# Supplementary figures and images for: Outcomes of Ending Self-Stigma, a Group Intervention to Reduce Internalized Stigma, Among Individuals With Serious Mental Illness
Source: Atypon-hosted journal article supplement (doi:10.1176/appi.ps.201900296), 2020-11-25

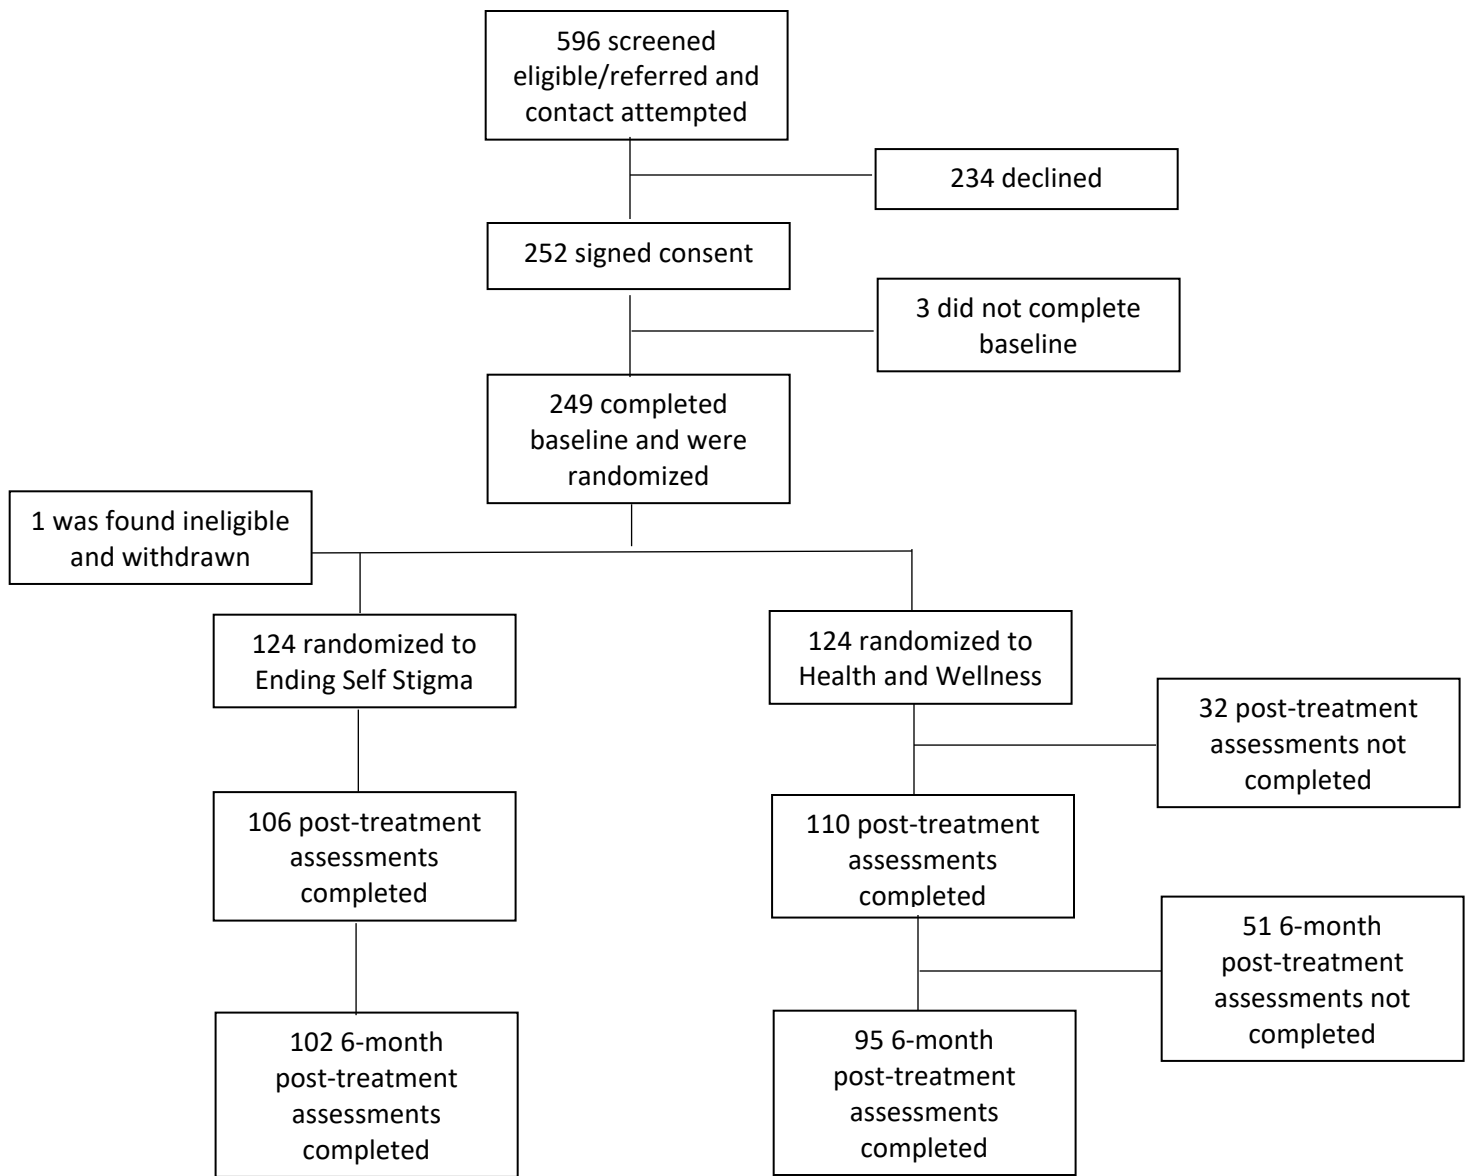

Figure 1. Flowchart of participants throughout the trial.

Supplement: appi.ps.201900296.ds001.pdf [file appi.ps.201900296.ds001.pdf]
